# Supplementary material
Source: publisher figshare collection journal article supplement (https://gsajournals.figshare.com/articles/dataset/_/14262425)
Supplement: Supplementary file 1 [file 2]

### FZO-1 and MFN1,2 interactome

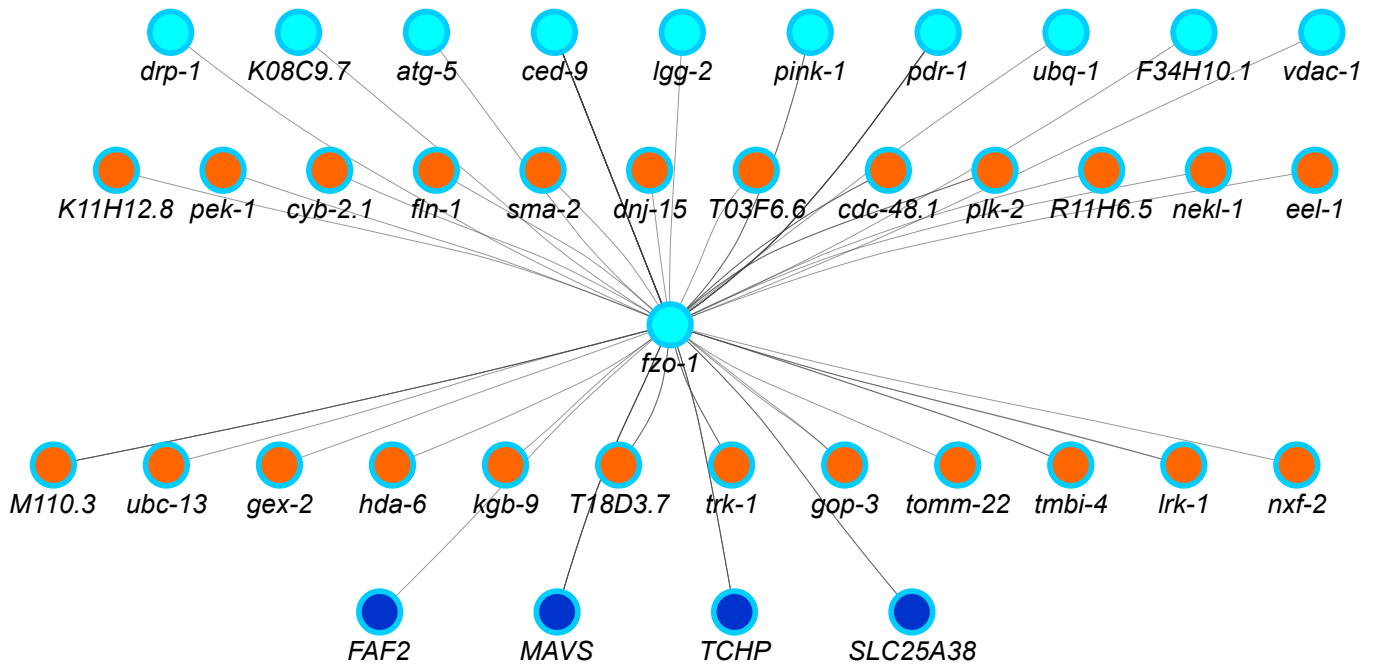

 Interactor of FZO-1     Ortholog of MFN1,2 interactor     Interactor of MFN1,2 without *C. elegans* ortholog

**Figure S3: Analysis of a gene network – the FZOome.** Interactors of *C. elegans* FZO-1 and of its human orthologs MFN1 and MFN2 were identified using ‘string-db.org’, ‘IntAct’, ‘BioGRID3.5’, ‘Genemania’, ‘CCSB’ and ‘mentha’ databases (Warde-Farley *et al.*, 2010; Calderone *et al.*, 2013; Orchard *et al.*, 2014; Rolland *et al.*, 2014; Oughtred *et al.*, 2019; Szklarczyk *et al.*, 2019). The identified candidates that suppressed or enhanced *fzo-1(tm1133)*-induced UPR<sup>mt</sup> do not overlap with the FZOome. Turquoise dots: interactors of FZO-1 in *C. elegans*; Orange dots: interactors of MFN1 or MFN2 which have orthologs in *C. elegans*; Blue dots: interactors of MFN1 or MFN2 in humans without any known orthologs in *C. elegans*.
