# Supplementary material
Source: publisher figshare collection journal article supplement (https://gsajournals.figshare.com/articles/dataset/_/14262425)
Supplement: Supplementary file 3 [file 2]

A

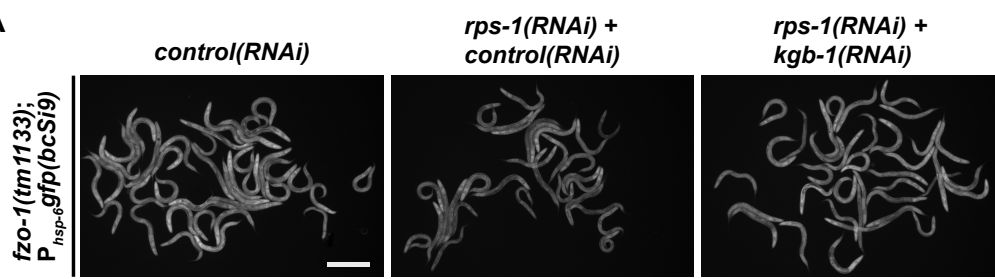

B

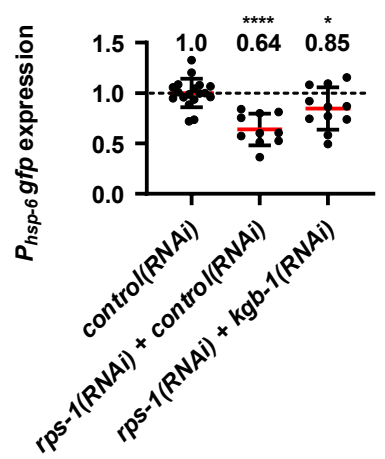

**Figure S1: Activation of the cSADDs response by *kgb-1(RNAi)* derepresses UPR<sup>mt</sup> upon attenuation of cytosolic translation.** (A) Fluorescence images of *fzo-1(tm1133)* mutant L4 larvae expressing  $P_{hsp-6 \text{ mtHSP70}} \text{ GFP (bcSi9)}$  upon empty vector (L4440, 'control(RNAi)'), *rps-1(RNAi)* diluted 1:1 with *control(RNAi)* or *kgb-1(RNAi)*, respectively. Scale bar: 200  $\mu\text{m}$ . (B) Quantification of fluorescence images from panel A. After subtracting the mean fluorescence intensity of wild type (+/+) on *control(RNAi)*, the values were normalized to *fzo-1(tm1133)* on *control(RNAi)*. Each dot represents the quantification of fluorescence intensity of 15-20 L4 larvae. Values indicate means  $\pm$  SD of at least 3 independent experiments in duplicates. \*\* $P < 0.01$ , \*\*\*\* $P < 0.0001$  using one-way ANOVA with Dunnett's multiple comparison test to *control(RNAi)*.
