# Supplementary material
Source: publisher figshare collection journal article supplement (https://gsajournals.figshare.com/articles/dataset/_/14262425)
Supplement: Supplementary file 4 [file 2]

**UPR<sup>mt</sup>ome subset, direct interactors in *C. elegans***

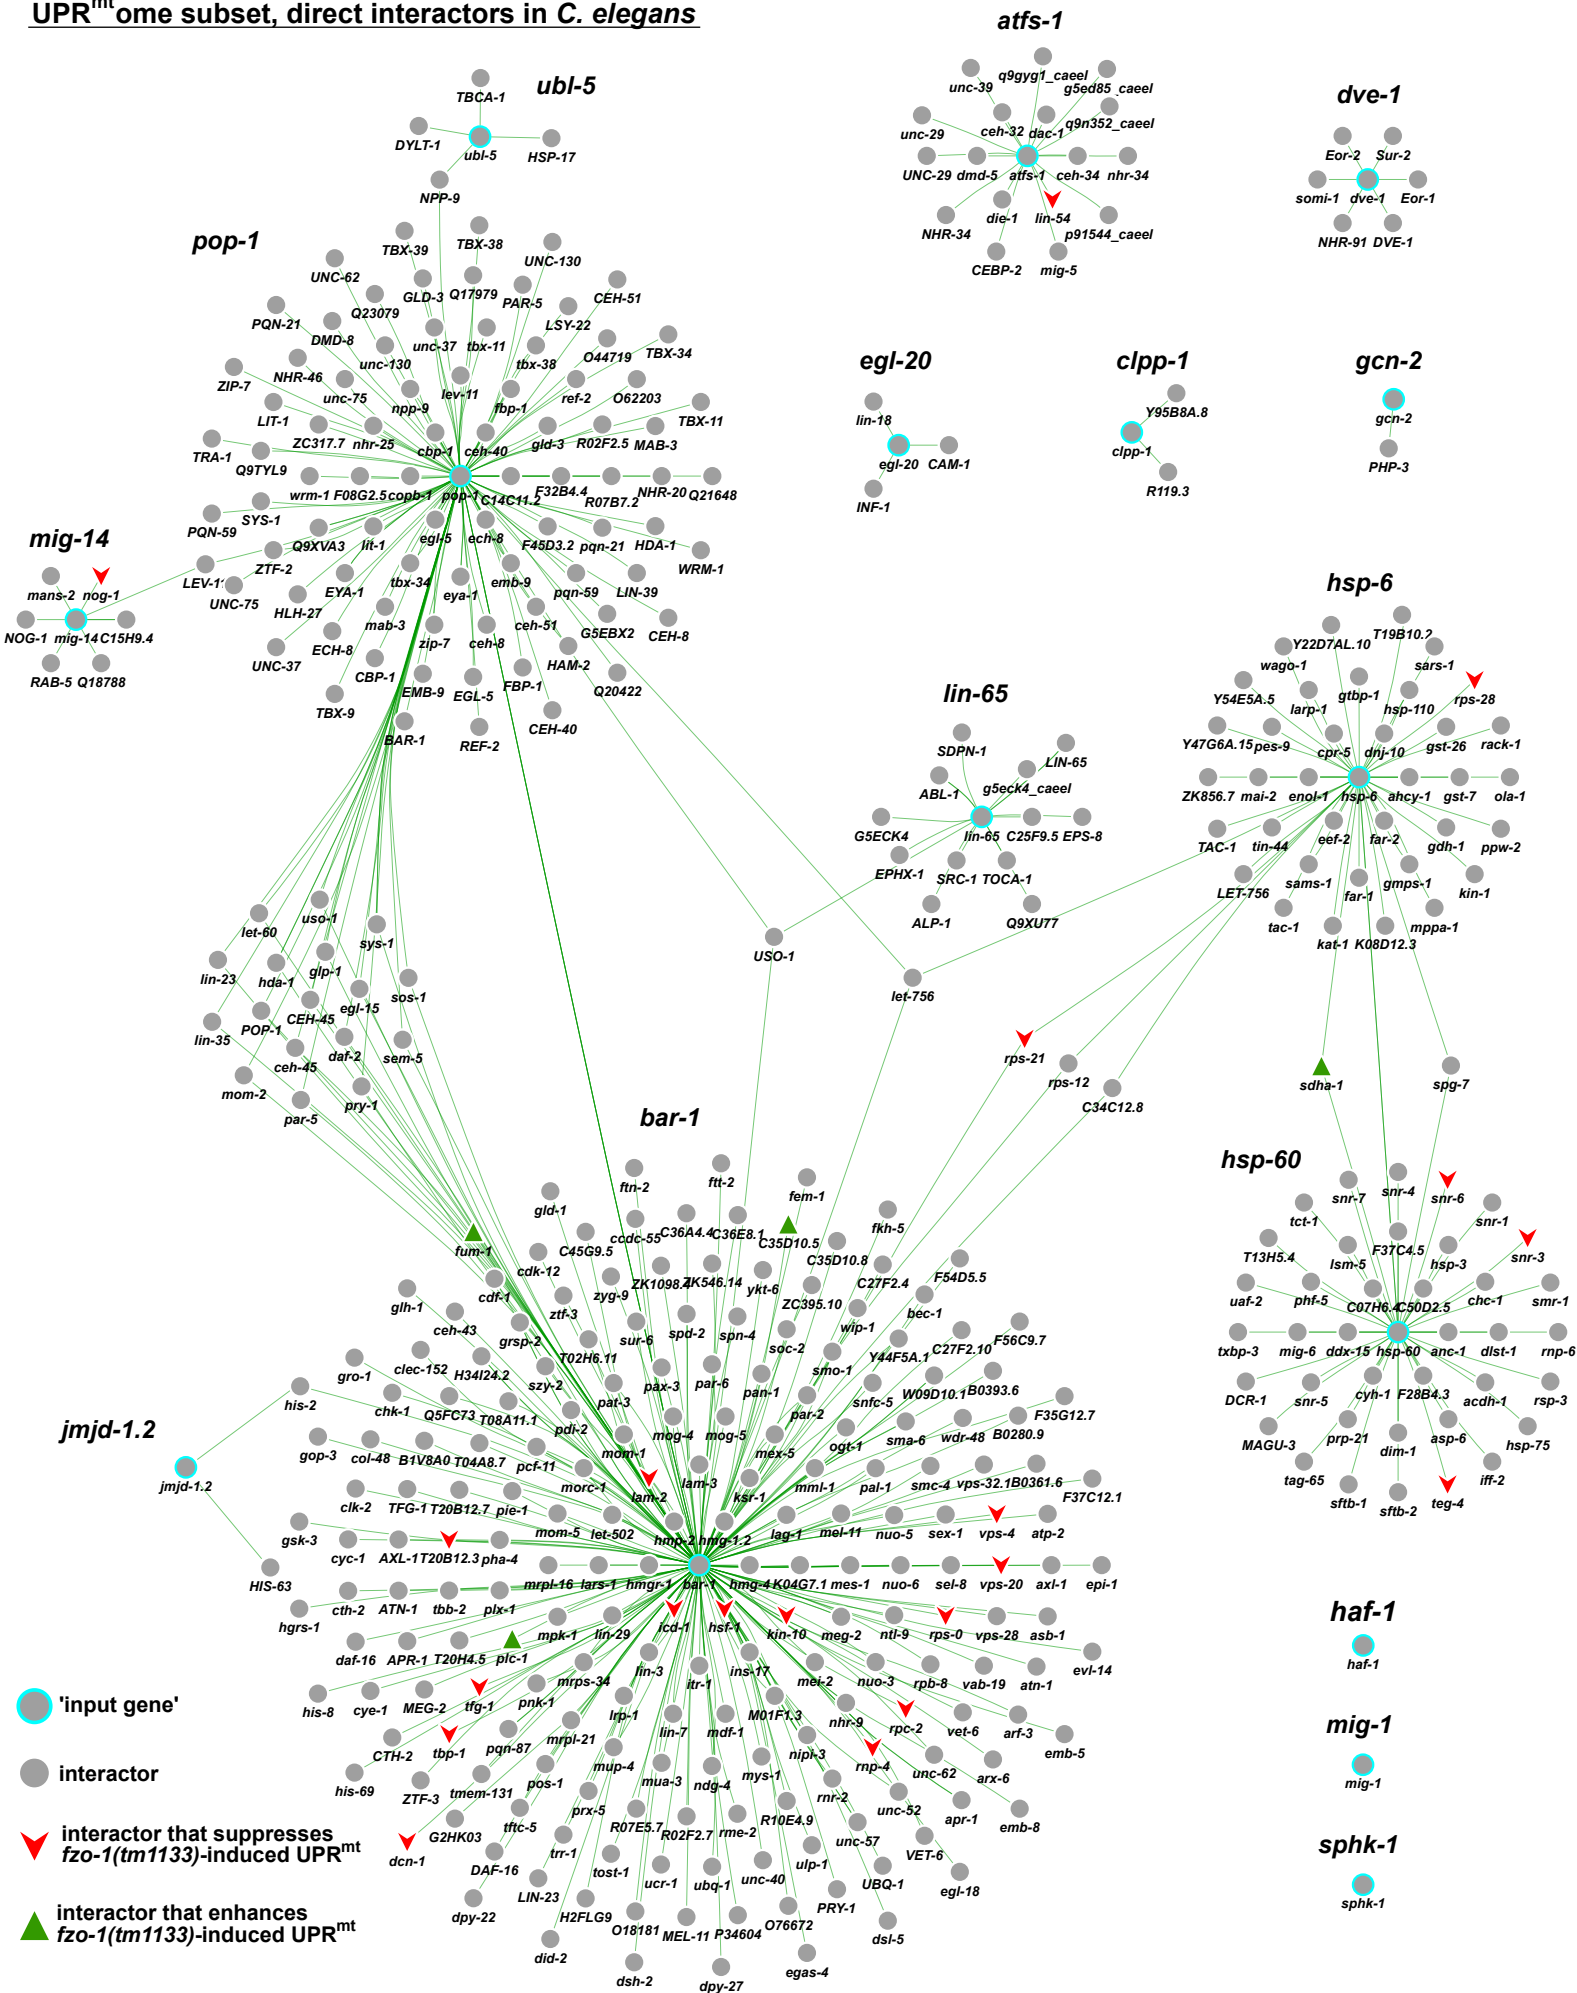

**Figure S4: Subset of the UPR<sup>mt</sup>ome, direct interactors in *C. elegans*.** 'Input genes' associated with the GO-term 'mitochondrial unfolded protein response' are indicated by turquoise circles and their interactors in *C. elegans* are indicated by grey dots. Red arrowheads: suppressors of *fzo-1(tm1133)*-induced UPR<sup>mt</sup> that overlap with the UPR<sup>mt</sup>ome subset; Green triangles: enhancers of *fzo-1(tm1133)*-induced UPR<sup>mt</sup> that overlap with the UPR<sup>mt</sup>ome subset.
