# Supplementary material
Source: publisher figshare collection journal article supplement (https://gsajournals.figshare.com/articles/dataset/_/14262425)

# Complete UPR<sup>mt</sup>ome

*hsp-60*

*pop-1*

● 'input gene' ● interactor

▼ interactor that suppresses *fzo-1(tm1133)*-induced UPR<sup>mt</sup>

▲ interactor that enhances *fzo-1(tm1133)*-induced UPR<sup>mt</sup>

*atfs-1*

*lin-65*

*spkh-1*

*dve-1*

*mig-1*

*gcn-2*

*bar-1*

*mig-14*

*jmjd-1.2*

*egl-20*

*haf-1*

*ubl-5*

*hsp-6*

*clpp-1*

**Figure S6: Complete UPR<sup>mt</sup>ome.** 'Input genes' associated with the GO-term 'mitochondrial unfolded protein response' are indicated by turquoise circles and their interactors in *C. elegans* and humans are indicated by grey dots. Red arrows: suppressors of *fzo-1(tm1133)*-induced UPR<sup>mt</sup> within the UPR<sup>mt</sup>ome; Green triangles: enhancers of *fzo-1(tm1133)*-induced UPR<sup>mt</sup> within the UPR<sup>mt</sup>ome. Green lines indicate interactions in *C. elegans*, blue lines indicate interactions of human orthologs.

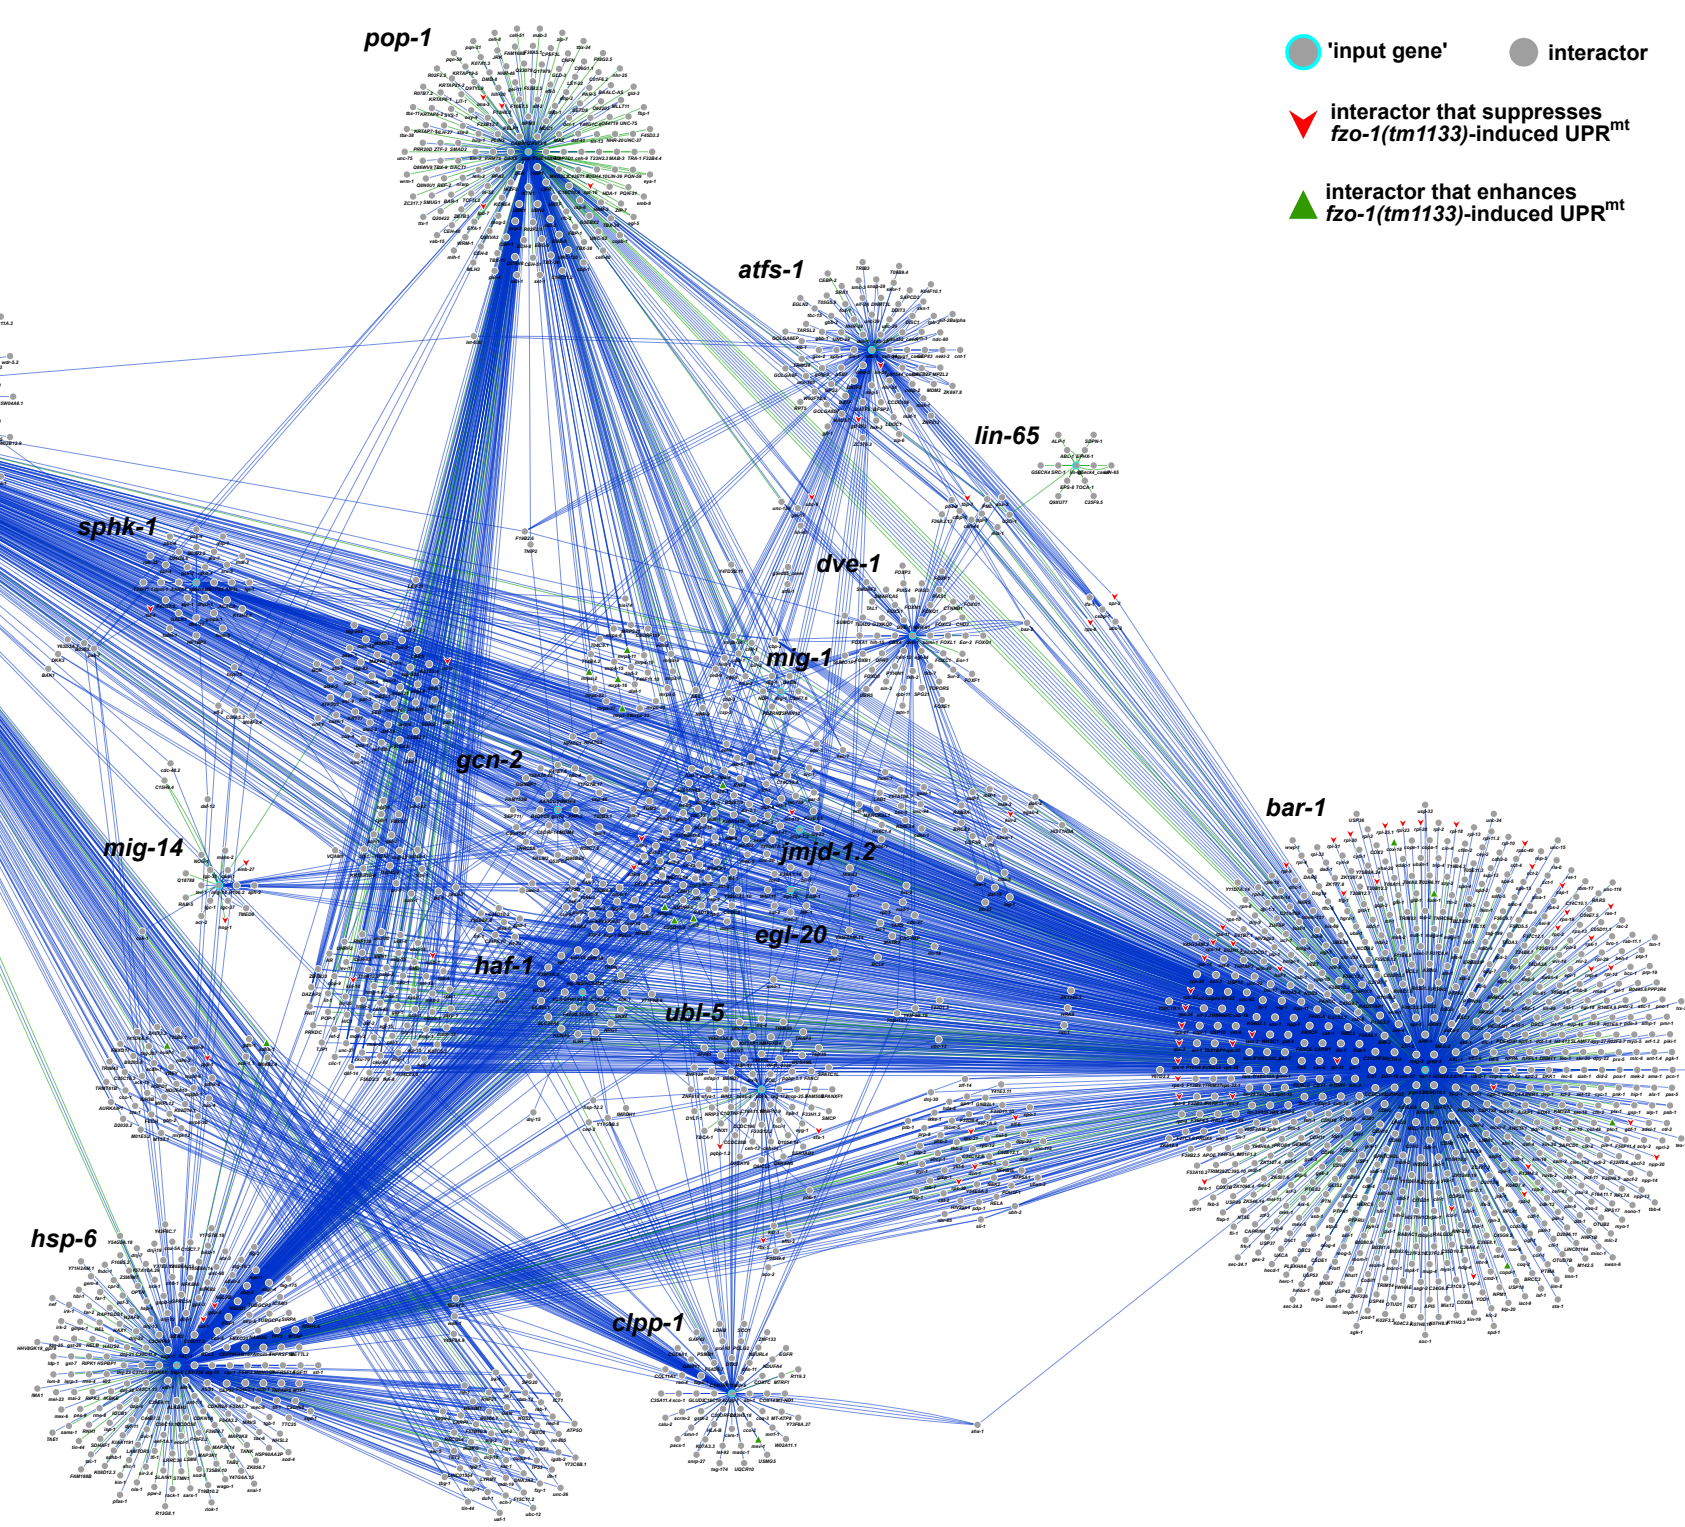

Supplement: Supplementary file 5 [file 2]
