# Supplementary material
Source: publisher figshare collection journal article supplement (https://gsajournals.figshare.com/articles/dataset/_/14262425)
Supplement: Supplementary file 6 [file 2]

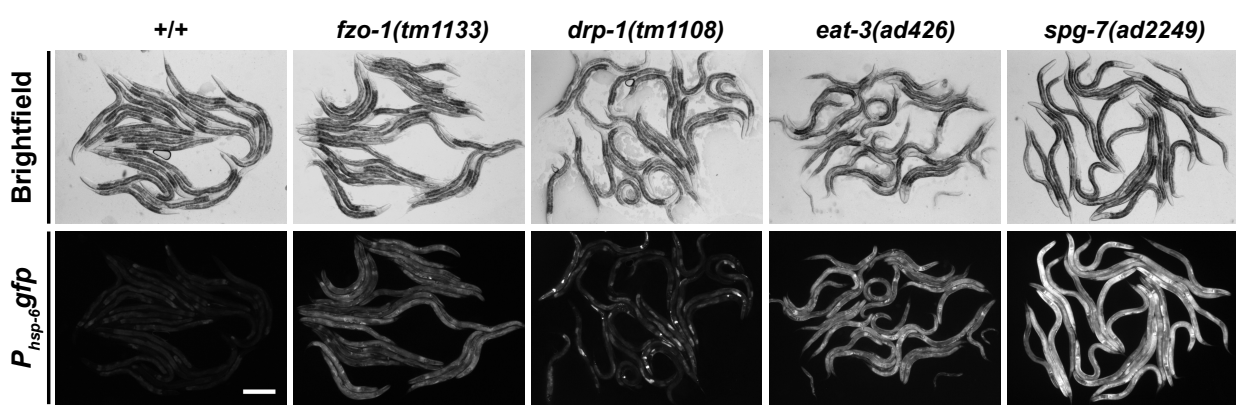

**Figure S2: Mutations in GTPases of the dynamin family induce the UPR<sup>mt</sup>.** *fzo-1(tm1133)*, *drp-1(tm1108)* and *eat-3(ad426)* mutants differ in the level of induction of the  $P_{hsp-6\text{ mtHSP70}}gfp$  (*zcls13*) reporter, as compared to wild type (+/+). *spg-7(ad2249)* is used as a positive control. Scale bar: 200  $\mu$ m.
